# Supplementary material for: Quality of Rainbow Trout (Oncorhynchus mykiss) Reared in Recirculating Aquaculture System and during Depuration Based on Chemical and Sensory Analysis
Source: Hindawi journal article supplement (doi:10.1155/2023/3537294), 2023-07-10
Supplement: f1 [file 3537294.f1.docx]

Supplementary Table S1. Selected off-flavor compounds, standard purity, chemical formulas, CAS numbers, densities, and aroma descriptions.

| **Compound** | **Purity** | **Chemical formula** | **CAS nbr** | **Density, g mL-1** | **Aroma** |
| --- | --- | --- | --- | --- | --- |
| Acetoin /3-hydroxy-butan-2-one/ | ≥99% | CH3CH(OH)C(O)CH3 | 513-86-0 | 1.013 | buttery |
| Caproic acid/  Hexanoic acid | ≥99% | CH3(CH2)4COOH | 142-62-1 | 0.927 | goat-like |
| Caproic aldehyde/  Hexanal | ≥95% | CH3(CH2)4CHO | 66-25-1 | 0.815 | grass |
| Caprylic acid/  Octanoic acid | ≥99.5% | CH3(CH2)6COOH | 124-07-2 | 0.910 | fruity-acid, irritating |
| Caprylic aldehyde/  Octanal | 99% | CH3(CH2)6CHO | 124-13-0 | 0.821 | fruit-like |
| Geosmin/  dimethyl-8  -hydronaphtalen | 99% | C12H22O | 16423-19-1 | 10-4 | musty |
| 3-Isobutyl-2-methoxy- pyrazine | 99% | C₉H₁₄N₂O | 24683-00-9 | 0.990 | undesirable, musty |
| 2-Isopropyl-3-methoxypyrazine | ≥98% | C₈H₁₂N₂O | 25773-40-4 | 0.996 | undesirable, musty |
| 2-Methylisoborneol | 99% | C11H20O | 2371-42-8 | 0.968 | earthy |
| 3-(Methylthio)propionaldehyde | 98% | CH3S(CH2)2CHO | 3268-49-3 | 1.052 | onion-like, meat-like |
| Phenylacetaldehyde | 95% | C8H8O | 122-78-1 | 1,075 | sweet, rose, flowery |
| α-Terpineol | 96% | C10H18O | 98-55-5 | 0.930 | terpenic |
| 2,4,6-Trichloroanisole | 99% | C7H5Cl3O | 87-40-1 | solid | medicinal, phenolic, iodine-like |
| Vanillin /4-hydroxy-3-methoxybenzaldehyde | 99% | C₁₆H₁₆N₂O₄ | 1696-60-2 | 1.056 | vanilla, sweet |

Supplementary Table S2. Limits of detection (LOD)s, quantification (LOQ)s, and linearities (R2) of the selected off-flavors in the aqueous sample (1–100 ng L-1) analyzed with automated SPME-GC-QQQ.

| **Compound** | **LOD** | **LOQ** | **Linearity, R2** |
| --- | --- | --- | --- |
| Acetoin, ng L-1 | 0.45 | 0.80 | 0.9949 |
| GSM, ng L-1 | 0.11 | 0.15 | 0.9861 |
| Hexanal, ng L-1 | 0.73 | 1.23 | 0.9933 |
| Hexanoic acid, ng L-1 | 1.61 | 5.50 | 0.9934 |
| IBMP, ng L-1 | 1.26 | 1.26 | 0.9998 |
| IPMP, ng L-1 | 0.12 | 0.53 | 0.9883 |
| MIB, ng L-1 | 0.39 | 0.41 | 0.9918 |
| Methional, ng L-1 | 1.04 | 1.40 | 0.9931 |
| Octanal, ng L-1 | 0.29 | 0.96 | 0.9941 |
| Octanoic acid, ng L-1 | 1.61 | 2.44 | 0.9949 |
| Phenylacetaldehyde, ng L-1 | 0.32 | 0.78 | 0.9988 |
| TCA, ng L-1 | 0.55 | 1.31 | 0.9959 |
| α-Terpineol, ng L-1 | 0.85 | 1.05 | 0.9938 |
| Vanillin, ng L-1 | 0.24 | 0.65 | 0.9800 |

Supplementary Table S3. LODs, LOQs, and linearities (R2) of selected off-flavors in fish muscle (100–1000 ng kg-1) analyzed with automated SPME-GC-QQQ.

| **Compound** | **LOD** | **LOQ** | **Linearity, R2** |
| --- | --- | --- | --- |
| Acetoin, ng kg-1 | 41.1 | 45.7 | 0.9999 |
| GSM, ng kg-1 | 23.0 | 65.1 | 0.9972 |
| Hexanal, ng kg-1 | 35.4 | 99.4 | 0.9769 |
| Hexanoic acid, ng kg-1 | 18.7 | 39.9 | 0.9999 |
| IBMP, ng kg-1 | 29.8 | 99.6 | 0.9985 |
| IPMP, ng kg-1 | 13.9 | 45.6 | 0.9999 |
| MIB, ng kg-1 | 51.8 | 107.1 | 0.9988 |
| Methional, ng kg-1 | 6.2 | 20.7 | 0.9984 |
| Octanal, ng kg-1 | 30.2 | 100.7 | 0.9958 |
| Octanoic acid, ng kg-1 | 28.3 | 94.4 | 0.9976 |
| Phenylacetaldehyde, ng kg-1 | 16.0 | 20.2 | 0.9973 |
| TCA, ng kg-1 | 27.3 | 91.0 | 0.9949 |
| α-Terpineol, ng kg-1 | 13.4 | 51.3 | 0.9930 |
| Vanillin, ng kg-1 | 14.0 | 46.6 | 0.9932 |


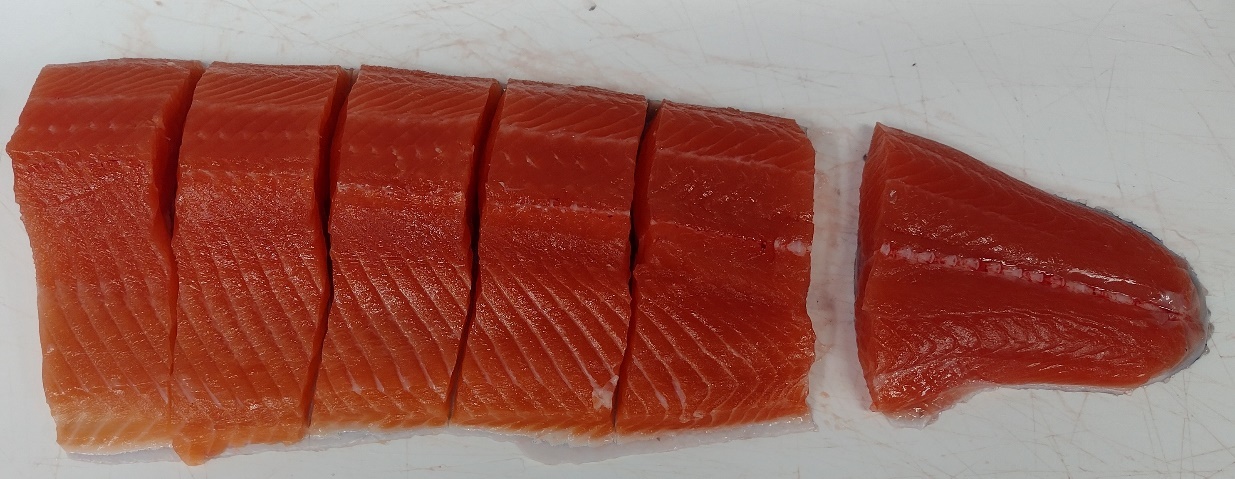


Supplementary Fig. S1. Fish fillet was divided into five pieces of similar size (minimum 50 g), and the tip of the tail was discarded. The pieces were used for sensory evaluation by the sensory panelists and for chemical analysis.
